# Supplementary material
Source: ML conference proceedings conference paper supplement (https://proceedings.mlr.press/v130/hao21a.html)
Supplement: Supplementary file 1 [file hao21a-supp.pdf]

## A Proof of Theorem 4.2

*Proof.* In this section, we prove the regret bound of online Lasso fitted-Q-iteration. We need a notion of restricted eigenvalue that is common in high-dimensional statistics [Bickel et al., 2009, Bühlmann and Van De Geer, 2011].

**Definition A.1 (Restricted eigenvalue).** Given a positive semi-definite matrix  $Z \in \mathbb{R}^{d \times d}$  and integer  $s \geq 1$ , define the restricted minimum eigenvalue of  $Z$  as  $C_{\min}(Z, s) :=$

$$\min_{S \subset [d], |S| \leq s} \min_{\beta \in \mathbb{R}^d} \left\{ \frac{\langle \beta, Z\beta \rangle}{\|\beta_S\|_2^2} : \|\beta_{S^c}\|_1 \leq 3\|\beta_S\|_1 \right\}.$$

Recall that  $\pi_e$  is an exploratory policy that satisfies Definition 3.1, e.g.,

$$\sigma_{\min} \left( \mathbb{E}^{\pi_e} \left[ \frac{1}{H} \sum_{h=1}^H \phi(x_h, a_h) \phi(x_h, a_h)^\top \right] \right) > 0,$$

where  $x_1 \sim \xi_0$ ,  $a_h \sim \pi(\cdot|x_h)$ ,  $x_{h+1} \sim P(\cdot|x_h, a_h)$  and  $\mathbb{E}^{\pi_e}$  denotes expectation over the sample path generated under policy  $\pi_e$ . Recall that  $N_1$  is the number of episodes in exploration phase that will be specified later. Denote  $\pi_{N_1}$  as the greedy policy with respect to the estimated Q-value calculated from the Lasso fitted-Q-iteration in Algorithm 1. According to the design of Algorithm 1, we keep using  $\pi_{N_1}$  for the remaining  $N - N_1$  episodes after exploration phase. From the definition of the cumulative regret in Eq. (2.3), we decompose  $R_N$  according to the exploration phase and exploitation phase:

$$R_N = \sum_{n=1}^N \left( V_1^*(x_1^n) - V_1^{\pi_n}(x_1^n) \right) = \underbrace{\sum_{n=1}^{N_1} \left( V_1^*(x_1^n) - V_1^{\pi_e}(x_1^n) \right)}_{I_1: \text{regret during exploring}} + \underbrace{\sum_{n=N_1+1}^N \left( V_1^*(x_1^n) - V_1^{\pi_{N_1}}(x_1^n) \right)}_{I_2: \text{regret during exploiting}}.$$

Since we assume  $r \in [0, 1]$ , from the definition of value functions, it is easy to see  $0 \leq V_1^*(x), V_1^{\pi_e}(x) \leq H$  for any  $x \in \mathcal{X}$ . Thus, we can upper bound  $I_1$  by

$$I_1 \leq N_1 H. \quad (\text{A.1})$$

To bound  $I_2$ , we will bound  $\|V_1^* - V_1^{\pi_{N_1}}\|_\infty$  first using the following lemma. The detailed proof is deferred to Lemma B.4. Recall that  $C_{\min}(\Sigma^{\pi_e}, s)$  is the restricted eigenvalue in Definition A.1 and we split the exploratory dataset into  $H$  folds with  $R$  episodes per fold.

**Lemma A.2.** Suppose the number of episodes in the exploration phase satisfies

$$N_1 \geq \frac{C_1 s^2 H \log(3d^2/\delta)}{C_{\min}(\Sigma^{\pi_e}, s)},$$

for some sufficiently large constant  $C_1$  and  $\lambda_1 = H \sqrt{\log(2d/\delta)/(RH)}$ . Then we have with probability at least  $1 - \delta$ ,

$$\|V_1^{\hat{\pi}_{N_1}} - V_1^*\|_\infty \leq \frac{32\sqrt{2}sH^3}{C_{\min}(\Sigma^{\pi_e}, s)} \sqrt{\frac{\log(2dH/\delta)}{N_1}}.$$

According to Lemma A.2, we have

$$I_2 \leq N \|V_1^{\hat{\pi}_{N_1}} - V_1^*\|_\infty \leq N \frac{32\sqrt{2}sH^3}{C_{\min}(\Sigma^{\pi_e}, s)} \sqrt{\frac{\log(2dH/\delta)}{N_1}}. \quad (\text{A.2})$$

Putting the regret bound during exploring (Eq. (A.1)) and the regret bound during exploiting (Eq. (A.2)), we have

$$R_N \leq N_1 H + N \frac{32\sqrt{2}sH^3}{C_{\min}(\Sigma^{\pi_e}, s)} \sqrt{\frac{\log(2dH/\delta)}{N_1}}.$$

We optimize  $N_1$  by letting

$$N_1 H = N \frac{32\sqrt{2}sH^3}{C_{\min}(\Sigma^{\pi_e}, s)} \sqrt{\frac{\log(2dH/\delta)}{N_1}} \Rightarrow N_1 = \left( \frac{2048s^2H^4N^2}{C_{\min}(\Sigma^{\pi_e}, s)^2} \log(2dH/\delta) \right)^{1/3}. \quad (\text{A.3})$$

With this choice of  $N_1$ , we have with probability at least  $1 - \delta$

$$R_N \leq 2H \left( \frac{2048s^2H^4N^2}{C_{\min}(\Sigma^{\pi_e}, s)^2} \log(2dH/\delta) \right)^{1/3}.$$

□

**Remark A.3.** The optimal choice of  $N_1$  in Eq. (A.3) requires the knowledge of  $s$  and  $C_{\min}(\Sigma, s)$  that is typically not available in practice. Thus, we can choose a relatively conservative  $N_1$  as

$$N_1 = (512H^4N^2 \log(2dH/\delta))^{1/3},$$

such that

$$R_N \leq 4 \frac{s}{C_{\min}(\Sigma^{\pi_e}, s)} H (512s^2H^4N^2 \log(2dH/\delta))^{1/3}.$$

## B Additional proofs

### B.1 Feature constructions

Specifically, let

$$\begin{aligned} \phi(x_0, a_k^0) &= (\underbrace{0, \dots, 0}_{d+2}, \underbrace{0, \dots, 0}_{k-1}, \underbrace{1, 0, \dots, 0, 1}_{d-k}) \in \mathbb{R}^{2d+3}, \\ \phi(x_0, a_j^0) &= (\underbrace{0, \dots, 0}_{d+2}, \underbrace{0, \dots, 0}_{j-1}, \underbrace{1, 0, \dots, 0, 1}_{d-j}) \in \mathbb{R}^{2d+3}. \end{aligned}$$

for  $j \in [d]$  but  $j \neq k$ . In addition, we let  $\psi(x_i) = (\bar{\theta}^{(k)\top}, 0) \in \mathbb{R}^{2d+3}$  and  $\psi(x_u) = (-\bar{\theta}^{(k)\top}, 1) \in \mathbb{R}^{2d+3}$ . Now we can verify for  $a_k^0$ :

$$\begin{aligned} \mathbb{P}(x_u | x_0, a_k^0) &= \phi(x_0, a_k^0)^\top \psi(x_u) = 0, \\ \mathbb{P}(x_i | x_0, a_k^0) &= \phi(x_0, a_k^0)^\top \psi(x_i) = 1, \end{aligned}$$

and for  $a_j^0$  ( $j \neq k$ ):

$$\begin{aligned} \mathbb{P}(x_u | x_0, a_j^0) &= \phi(x_0, a_j^0)^\top \psi(x_u) = 1, \\ \mathbb{P}(x_i | x_0, a_j^0) &= \phi(x_0, a_j^0)^\top \psi(x_i) = 0, \end{aligned}$$

### B.2 Proof of Claim 3.6

*Proof.* We prove the first part. To simplify the notation, we write  $\varphi_{nj}$  short for  $\varphi_j(x_u, A_2^n)$ . From Eq. (3.6), we have

$$\begin{aligned} R_N(\mathcal{M}_k) &\geq (H-1) \mathbb{E}_k \left[ \left( (\tau_k - 1)(s-1)\varepsilon - \sum_{n=1}^{\tau_k} \sum_{j=1}^{s-1} \varphi_{nj} \varepsilon \right) \mathbb{I}(\mathcal{D}_k) \right] \\ &\geq \frac{Hs\varepsilon}{8} \mathbb{E}_k \left[ \frac{\tau_k(s-1)\varepsilon}{2} \mathbb{I}(\mathcal{D}_k) \right]. \end{aligned}$$

Second, we derive a regret lower bound of alternative MDP  $\widetilde{\mathcal{M}}_k$ . Define  $\widetilde{a}^* = \operatorname{argmax}_{a_j^y \in \mathcal{A}_2} \varphi(x_u, a_j^y)^\top \widetilde{\theta}^{(k)}$  as the optimal action when the learner is at state  $x_u$  in MDP  $\mathcal{M}_k$ . By a similar decomposition in Eq. (3.6),

$$\begin{aligned} R_N(\widetilde{\mathcal{M}}_k) &\geq (H-1) \left( \widetilde{\mathbb{E}}_k \left[ \sum_{n=1}^{\tau_k-1} \langle \varphi(x_u, \widetilde{a}^*), \widetilde{\theta}^{(k)} \rangle \right] - \widetilde{\mathbb{E}}_k \left[ \sum_{n=1}^{\tau_k-1} \langle \varphi_n, \widetilde{\theta}^{(k)} \rangle \right] \right) \\ &= (H-1) \widetilde{\mathbb{E}}_k \left[ 2\tau_k(s-1)\varepsilon - \sum_{n=1}^{\tau_k-1} \langle \varphi_n, \widetilde{\theta}^{(k)} \rangle \right]. \end{aligned} \quad (\text{B.1})$$

Next, we will find an upper bound for  $\sum_{n=1}^{\tau_k-1} \langle \varphi_n, \widetilde{\theta}^{(k)} \rangle$ . From the definition of  $\widetilde{\theta}^{(k)}$  in Eq. (3.5),

$$\begin{aligned} \sum_{n=1}^{\tau_k-1} \langle \varphi_n, \widetilde{\theta}^{(k)} \rangle &= \sum_{n=1}^{\tau_k-1} \langle \varphi_n, \theta + 2\varepsilon \widetilde{z}^{(k)} \rangle \\ &= \sum_{n=1}^{\tau_k-1} \langle \varphi_n, \theta \rangle + 2\varepsilon \sum_{n=1}^{\tau_k-1} \langle \varphi_n, \widetilde{z}^{(k)} \rangle \\ &\leq \sum_{n=1}^{\tau_k-1} \langle \varphi_n, \theta \rangle + 2\varepsilon \sum_{n=1}^{\tau_k-1} \sum_{j \in \operatorname{supp}(\widetilde{z}^{(k)})} |\varphi_{nj}|, \end{aligned} \quad (\text{B.2})$$

where the last inequality is from the definition of  $\widetilde{z}^{(k)}$  in Eq. (3.5). To bound the first term, we have

$$\begin{aligned} \sum_{n=1}^{\tau_k-1} \langle \varphi_n, \theta \rangle &= \sum_{n=1}^{\tau_k-1} \sum_{j=1}^{s-1} \varphi_{nj} \varepsilon \\ &\leq \varepsilon \sum_{n=1}^{\tau_k-1} \sum_{j=1}^{s-1} |\varphi_{nj}|. \end{aligned} \quad (\text{B.3})$$

Since all the  $\varphi_n$  come from  $\mathcal{S}$  which is a  $(s-1)$ -sparse set, we have

$$\sum_{n=1}^{\tau_k-1} \sum_{j=1}^d |\varphi_{nj}| = (s-1)\tau_k,$$

which implies

$$\begin{aligned} \sum_{n=1}^{\tau_k-1} \left( \sum_{j=1}^{s-1} |\varphi_{nj}| + \sum_{j \in \operatorname{supp}(\widetilde{x})} |\varphi_{nj}| \right) &\leq \sum_{n=1}^{\tau_k-1} \sum_{j=1}^d |\varphi_{nj}| = (s-1)(\tau_k-1), \\ \sum_{n=1}^{\tau_k-1} \sum_{j=1}^{s-1} |\varphi_{nj}| &\leq (s-1)(\tau_k-1) - \sum_{n=1}^{\tau_k-1} \sum_{j \in \operatorname{supp}(\widetilde{x})} |\varphi_{nj}|. \end{aligned} \quad (\text{B.4})$$

Combining with Eq. (B.3),

$$\sum_{n=1}^{\tau_k-1} \langle \varphi_n, \theta \rangle \leq \varepsilon \left( (s-1)(\tau_k-1) - \sum_{n=1}^{\tau_k-1} \sum_{j \in \operatorname{supp}(\widetilde{x})} |\varphi_{nj}| \right)$$

Plugging the above bound into Eq. (B.2), it holds that

$$\sum_{n=1}^{\tau_k-1} \langle \varphi_n, \widetilde{\theta} \rangle \leq \varepsilon(s-1)(\tau_k-1) + \varepsilon \sum_{n=1}^{\tau_k-1} \sum_{j \in \operatorname{supp}(\widetilde{x})} |\varphi_{nj}|. \quad (\text{B.5})$$

When the event  $\mathcal{D}_k^c$  (the complement event of  $\mathcal{D}_k$ ) happen, we have

$$\sum_{n=1}^{\tau_k-1} \sum_{j=1}^{s-1} |\varphi_{nj}| \geq \sum_{n=1}^{\tau_k-1} \sum_{j=1}^{s-1} \varphi_{nj} \geq \frac{(\tau_k-1)(s-1)}{2}.$$

Combining with Eq. (B.4), we have under event  $\mathcal{D}_k^c$ ,

$$\sum_{n=1}^{\tau_k-1} \sum_{j \in \text{supp}(\bar{x})} |\varphi_{n,j}| \leq \frac{(\tau_k-1)(s-1)}{2}. \quad (\text{B.6})$$

Putting Eqs. (B.1), (B.5), (B.6) together, it holds that

$$R_N(\widetilde{\mathcal{M}}_k) \geq (H-1) \widetilde{\mathbb{E}}_k \left[ \frac{(\tau_k-1)(s-1)\varepsilon}{2} \mathbb{I}(\mathcal{D}_k^c) \right]. \quad (\text{B.7})$$

Putting the lower bounds of  $R_N(\mathcal{M}_k)$  and  $R_N(\widetilde{\mathcal{M}}_k)$  together, we have

$$\begin{aligned} R_N(\mathcal{M}_k) + R_N(\widetilde{\mathcal{M}}_k) &\geq (H-1) \left( \mathbb{E}_k \left[ \frac{(\tau_k-1)(s-1)\varepsilon}{2} \mathbb{I}(\mathcal{D}_k) \right] + \widetilde{\mathbb{E}}_k \left[ \frac{(\tau_k-1)(s-1)\varepsilon}{2} \mathbb{I}(\mathcal{D}_k^c) \right] \right) \\ &= \frac{Hs\varepsilon}{8} \left( \mathbb{E}_k \left[ \tau_k \left( \mathbb{I}(\mathcal{D}_k) + \mathbb{I}(\mathcal{D}_k^c) \right) \right] + \widetilde{\mathbb{E}}_k [\tau_k \mathbb{I}(\mathcal{D}_k^c)] - \mathbb{E}_k [\tau_k \mathbb{I}(\mathcal{D}_k^c)] \right) \\ &= \frac{Hs\varepsilon}{8} \left( \mathbb{E}_k [\tau_k] + \widetilde{\mathbb{E}}_k [\tau_k \mathbb{I}(\mathcal{D}_k^c)] - \mathbb{E}_k [\tau_k \mathbb{I}(\mathcal{D}_k^c)] \right). \end{aligned}$$

This ends the proof.  $\square$

### B.3 Proof of Claim 3.7

*Proof.* The KL-calculation is inspired by Jaksch et al. [2010], but with novel stopping time argument. Denote the state-sequence up to  $n$ th episode,  $h$ th step as  $\mathbb{S}_h^n = \{S_1^1, \dots, S_H^1, \dots, S_1^n, \dots, S_h^n\}$  and write  $\mathcal{X}_h^n = \{x_0, x_i, x_u, x_g, x_b\}^{(n-1)H+h}$ . For a fixed policy  $\pi$  interacting with the environment for  $n$  episodes, we denote  $\mathbb{P}_k(\cdot)$  as the distribution over  $\mathbb{S}^n$ , where  $S_1^n = x_0$ ,  $A_h^n \sim \pi(\cdot | S_h^n)$ ,  $S_{h+1}^n \sim \mathbb{P}_k(\cdot | S_h^n, A_h^n)$ . Let  $\mathbb{E}_k$  denote the expectation w.r.t. distribution  $\mathbb{P}_k$ . By the chain rule, we can decompose the KL divergence as follows:

$$\text{KL}(\widetilde{\mathbb{P}}_k \| \mathbb{P}_k) = \mathbb{E} \left[ \sum_{n=1}^{\tau_k-1} \sum_{h=1}^H \text{KL} \left[ \widetilde{\mathbb{P}}_k(S_{h+1}^n | \mathbb{S}_h^n) \middle\| \mathbb{P}_k(S_{h+1}^n | \mathbb{S}_h^n) \right] \right]. \quad (\text{B.8})$$

Given a random variable  $x$ , the KL divergence over two conditional probability distributions is defined as

$$\text{KL}(p(y|x), q(y|x)) = \sum_x \sum_y p(x, y) \log \left( \frac{p(y|x)}{q(y|x)} \right).$$

Then the KL divergence between  $\widetilde{\mathbb{P}}_k(S_{h+1}^n | \mathbb{S}_h^n)$  and  $\mathbb{P}_k(S_{h+1}^n | \mathbb{S}_h^n)$  can be calculated as follows:

$$\begin{aligned} &\text{KL} \left[ \widetilde{\mathbb{P}}_k(S_{h+1}^n | \mathbb{S}_h^n) \middle\| \mathbb{P}_k(S_{h+1}^n | \mathbb{S}_h^n) \right] \\ &= \sum_{\mathbb{S}_h^n \in \mathcal{X}_h^n} \sum_{x \in \mathcal{X}} \widetilde{\mathbb{P}}_k(S_{h+1}^n = x, \mathbb{S}_h^n) \log \left( \frac{\widetilde{\mathbb{P}}_k(S_{h+1}^n = x | \mathbb{S}_h^n)}{\mathbb{P}_k(S_{h+1}^n = x | \mathbb{S}_h^n)} \right) \\ &= \sum_{\mathbb{S}_h^n \in \mathcal{X}_h^n} \sum_{x \in \mathcal{X}} \widetilde{\mathbb{P}}_k(S_{h+1}^n = x | \mathbb{S}_h^n) \widetilde{\mathbb{P}}_k(\mathbb{S}_h^n) \log \left( \frac{\widetilde{\mathbb{P}}_k(S_{h+1}^n = x | \mathbb{S}_h^n)}{\mathbb{P}_k(S_{h+1}^n = x | \mathbb{S}_h^n)} \right) \\ &= \sum_{\mathbb{S}_{h-1}^n \in \mathcal{X}_{h-1}^n} \widetilde{\mathbb{P}}_k(\mathbb{S}_{h-1}^n) \sum_{x' \in \mathcal{X}, a \in \mathcal{A}} \widetilde{\mathbb{P}}_k(S_h^n = x', A_h^n = a | \mathbb{S}_{h-1}^n) \\ &\quad \cdot \sum_{x \in \mathcal{X}} \widetilde{\mathbb{P}}_k(S_{h+1}^n = x | \mathbb{S}_{h-1}^n, S_h^n = x', A_h^n = a) \log \left( \frac{\widetilde{\mathbb{P}}_k(S_{h+1}^n = x | \mathbb{S}_{h-1}^n, S_h^n = x', A_h^n = a)}{\mathbb{P}_k(S_{h+1}^n = x | \mathbb{S}_{h-1}^n, S_h^n = x', A_h^n = a)} \right). \end{aligned} \quad (\text{B.9})$$

According to the construction of  $\mathcal{M}_k$  and  $\widetilde{\mathcal{M}}_k$ , the learner will remain staying at the current state when  $x' = x_g$  or  $x_b$ , that implies

$$\widetilde{\mathbb{P}}_k(S_{h+1}^n = x | \mathbb{S}_{h-1}^n, S_h^n = x', A_h^n = a) = \mathbb{P}_k(S_{h+1}^n = x | \mathbb{S}_{h-1}^n, S_h^n = x', A_h^n = a).$$

In addition, from the definition of stopping time  $\tau_k$ , the learner will never transit to the informative state  $x_i$ . Therefore,

$$\begin{aligned}
 & \text{KL} \left[ \tilde{\mathbb{P}}_k(S_{h+1}^n | \mathbb{S}_h^n) \middle| \mathbb{P}_k(S_{h+1}^n | \mathbb{S}_h^n) \right] \\
 = & \sum_{\mathbb{S}_{h-1}^n \in \mathcal{X}^{t-1}} \tilde{\mathbb{P}}_k(\mathbb{S}_{h-1}^n) \sum_{x'=x_0, x_i, x_u} \sum_{a \in \mathcal{A}} \tilde{\mathbb{P}}_k(S_h^n = x', A_h^n = a | \mathbb{S}_{h-1}^n) \\
 & \cdot \sum_{x \in \mathcal{X}} \tilde{\mathbb{P}}_k(S_{h+1}^n = x | \mathbb{S}_{h-1}^n, S_h^n = x', A_h^n = a) \log \left( \frac{\tilde{\mathbb{P}}_k(S_{h+1}^n = x | \mathbb{S}_{h-1}^n, S_h^n = x', A_h^n = a)}{\mathbb{P}_k(S_{h+1}^n = x | \mathbb{S}_{h-1}^n, S_h^n = x', A_h^n = a)} \right) \\
 = & \sum_{a \in \mathcal{A}_2} \tilde{\mathbb{P}}_k(S_h^n = x_u, A_h^n = a) \sum_{x=x_g, x_b} \tilde{\mathbb{P}}_k(S_{h+1}^n = x | S_h^n = x_u, A_h^n = a) \log \left( \frac{\tilde{\mathbb{P}}_k(S_{h+1}^n = x | S_h^n = x_u, A_h^n = a)}{\mathbb{P}_k(S_{h+1}^n = x | S_h^n = x_u, A_h^n = a)} \right) \\
 = & \sum_{a \in \mathcal{A}_2} \tilde{\mathbb{P}}_k(S_h^n = x_u, A_h^n = a) \left( \langle \varphi(x_u, a), \tilde{\theta}^{(k)} \rangle \log \left( \frac{\langle \varphi(x_u, a), \tilde{\theta}^{(k)} \rangle}{\langle \varphi(x_u, a), \theta \rangle} \right) + (1 - \langle \varphi(x_u, a), \tilde{\theta}^{(k)} \rangle) \log \left( \frac{1 - \langle \varphi(x_u, a), \tilde{\theta}^{(k)} \rangle}{1 - \langle \varphi(x_u, a), \theta \rangle} \right) \right),
 \end{aligned}$$

where  $\mathcal{A}_2$  is the action set associated to state  $x_u$ . Moreover, we will use Lemma C.4 to bound the above last term. Letting  $q = \langle \varphi(x_u, a), \tilde{\theta}^{(k)} \rangle$  and  $\epsilon = \langle \varphi(x_u, a), \theta - \tilde{\theta}^{(k)} \rangle$ , it is easy to verify the conditions in Lemma C.4 as long as  $\epsilon \leq (10(s-1))^{-1}$ . Then we have

$$\begin{aligned}
 \text{KL} \left[ \tilde{\mathbb{P}}_k(S_{h+1}^n | \mathbb{S}_h^n) \middle| \mathbb{P}_k(S_{h+1}^n | \mathbb{S}_h^n) \right] & \leq \sum_{a \in \mathcal{A}_2} \tilde{\mathbb{P}}_k(S_h^n = x_u, A_h^n = a) \frac{2 \langle \tilde{\theta}^{(k)} - \theta, \varphi(x_u, a) \rangle^2}{\langle \tilde{\theta}^{(k)}, \varphi(x_u, a) \rangle} \\
 & = \sum_{a \in \mathcal{A}_2} \tilde{\mathbb{P}}_k(S_h^n = x_u, A_h^n = a) \frac{8\epsilon^2 \langle \tilde{z}^{(k)}, \varphi(x_u, a) \rangle^2}{\langle \theta, \varphi(x_u, a) \rangle}.
 \end{aligned}$$

Back to the KL-decomposition in Eq. (B.8), we have

$$\text{KL}(\tilde{\mathbb{P}}_k \| \mathbb{P}_k) \leq 8\epsilon^2 \tilde{\mathbb{E}}_k \left[ \sum_{n=1}^{\tau_k-1} \langle \varphi(x_u, A_2^n), \tilde{z} \rangle^2 \right].$$

To simplify the notations, we let  $\varphi_n = \varphi(x_u, A_2^n)$ .

Next, we use a simple argument ‘‘minimum is always smaller than the average’’. We decompose the following summation over action set  $\mathcal{S}'$  defined in Eq. (3.4),

$$\begin{aligned}
 \sum_{z \in \mathcal{S}'} \sum_{n=1}^{\tau_k-1} \langle \varphi_n, z \rangle^2 & = \sum_{z \in \mathcal{S}'} \sum_{n=1}^{\tau_k-1} \left( \sum_{j=1}^d z_j \varphi_{nj} \right)^2 \\
 & = \sum_{z \in \mathcal{S}'} \sum_{n=1}^{\tau_k-1} \left( \sum_{j=1}^d (z_j \varphi_{nj})^2 + 2 \sum_{i < j} z_i z_j \varphi_{ni} \varphi_{nj} \right).
 \end{aligned}$$

We bound the above two terms separately. To bound the first term, we observe that

$$\sum_{z \in \mathcal{S}'} \sum_{n=1}^{\tau_k-1} \sum_{j=1}^d (z_j \varphi_{nj})^2 = \sum_{z \in \mathcal{S}'} \sum_{n=1}^{\tau_k-1} \sum_{j=1}^d |z_j \varphi_{nj}|, \tag{B.10}$$

since both  $z_j, \varphi_{nj}$  can only take  $-1, 0, +1$ . In addition,  $\sum_{t=1}^{\tau_k-1} \sum_{j=1}^d |\varphi_{nj}| = (s-1)\tau_k$ . Since  $z \in \mathcal{S}'$  that is  $(s-1)$ -sparse, we have  $\sum_{j=1}^d |z_j \varphi_{nj}| \leq s-1$ . Therefore, we have

$$\sum_{z \in \mathcal{S}'} \sum_{n=1}^{\tau_k-1} \sum_{j=1}^d |z_j \varphi_{nj}| \leq (s-1)(\tau_k-1) \binom{d-s-1}{s-2}. \tag{B.11}$$

Putting Eqs. (B.10) and (B.11) together,

$$\sum_{z \in \mathcal{S}'} \sum_{n=1}^{\tau_k-1} \sum_{j=1}^d (z_j \varphi_{nj})^2 \leq (s-1)(\tau_k-1) \binom{d-s-1}{s-2}. \tag{B.12}$$

To bound the second term, we observe

$$\sum_{z \in \mathcal{S}'} \sum_{n=1}^{\tau_k-1} 2 \sum_{i < j} z_i z_j \varphi_{ni} \varphi_{nj} = 2 \sum_{n=1}^{\tau_k-1} \sum_{i < j} \sum_{z \in \mathcal{S}'} z_i z_j \varphi_{ni} \varphi_{nj}.$$

From the definition of  $\mathcal{S}'$ ,  $z_i z_j$  can only take values of  $\{1 * 1, 1 * -1, -1 * 1, -1 * -1, 0\}$ . This symmetry implies

$$\sum_{z \in \mathcal{S}'} z_i z_j \varphi_{ni} \varphi_{nj} = 0,$$

which implies

$$\sum_{z \in \mathcal{S}'} \sum_{n=1}^{\tau_k-1} 2 \sum_{i < j} z_i z_j \varphi_{ni} \varphi_{nj} = 0. \quad (\text{B.13})$$

Combining Eqs. (B.12) and (B.13) together, we have

$$\sum_{z \in \mathcal{S}'} \sum_{n=1}^{\tau_k-1} \langle \varphi_n, z \rangle^2 = \sum_{z \in \mathcal{S}'} \sum_{n=1}^{\tau_k-1} \sum_{j=1}^d |z_j \varphi_{nj}| \leq (s-1)(\tau_k-1) \binom{d-s-1}{s-2}.$$

In the end, we use the fact that the minimum of  $\tau_k - 1$  points is always smaller than its average,

$$\begin{aligned} \tilde{\mathbb{E}}_k \left[ \sum_{n=1}^{\tau_k-1} \langle \varphi_n, \tilde{z} \rangle^2 \right] &= \min_{z \in \mathcal{S}'} \tilde{\mathbb{E}}_k \left[ \sum_{n=1}^{\tau_k-1} \langle \varphi_n, z \rangle^2 \right] \\ &\leq \frac{1}{|\mathcal{S}'|} \sum_{z \in \mathcal{S}'} \tilde{\mathbb{E}}_k \left[ \sum_{n=1}^{\tau_k-1} \langle \varphi_n, z \rangle^2 \right] \\ &= \tilde{\mathbb{E}}_k \left[ \frac{1}{|\mathcal{S}'|} \sum_{z \in \mathcal{S}'} \sum_{n=1}^{\tau_k-1} \langle \varphi_n, z \rangle^2 \right] \\ &\leq \frac{(s-1) \tilde{\mathbb{E}}_k[\tau_k-1] \binom{d-s-1}{s-2}}{\binom{d-s}{s-1}} \\ &\leq \frac{(s-1)^2 \tilde{\mathbb{E}}_k[\tau_k-1]}{d}. \end{aligned}$$

Therefore, we reach

$$\text{KL}(\tilde{\mathbb{P}}_k \| \mathbb{P}_k) \leq \frac{8\varepsilon^2(s-1)^2 \tilde{\mathbb{E}}_k[\tau_k-1]}{d} \leq \frac{8\varepsilon^2(s-1)^2 N}{d} \leq 8\varepsilon^2(s-1)^2,$$

since we consider the data-poor regime that  $N \leq d$ . It is obvious to see  $\text{KL}(\mathbb{P}_0 \| \mathbb{P}_k) = 0$  from Eq. (B.9). This ends the proof.  $\square$

#### B.4 Proof of Lemma A.2

*Proof.* Recall that in the learning phase, we split the data collected in the exploration phase into  $H$  folds and each fold consists of  $R$  episodes or  $RH$  sample transitions. For the update of each step  $h$ , we use a fresh fold of samples.

**Step 1.** We verify that the execution of Lasso fitted-Q-iteration is equivalent to the approximate value iteration. Recall that a generic Lasso estimator with respect to a function  $V$  at step  $h$  is defined in Eq. (4.1) as

$$\hat{w}_h(V) = \operatorname{argmin}_{w \in \mathbb{R}^d} \left( \frac{1}{RH} \sum_{i=1}^{RH} \left( \Pi_{[0,H]} V(x_i^{(h)'}) - \phi(x_i^{(h)}, a_i^{(h)})^\top w \right)^2 + \lambda_1 \|w\|_1 \right).$$

Denote  $V_w(x) = \max_{a \in \mathcal{A}} (r(x, a) + \phi(x, a)^\top w)$ . For simplicity, we write  $\hat{w}_h := \hat{w}_h(V_{\hat{w}_{h+1}})$  for short. Define an approximate Bellman optimality operator  $\hat{\mathcal{T}}^{(h)} : \mathcal{X} \rightarrow \mathcal{X}$  as:

$$[\hat{\mathcal{T}}^{(h)} V](x) := \max_a \left[ r(x, a) + \phi(x, a)^\top \hat{w}_h(V) \right]. \quad (\text{B.14})$$

Note this  $\widehat{\mathcal{T}}^{(h)}$  is a randomized operator that only depends data from  $h$ th fold. The Lasso fitted-Q-iteration in learning phase of Algorithm 1 is equivalent to the following approximate value iteration:

$$[\widehat{\mathcal{T}}^{(h)}\Pi_{[0,H]}V_{\widehat{w}_{h+1}}](x) = \max_a \left[ r(x, a) + \phi(x, a)^\top \widehat{w}_h \right] = \max_a Q_{\widehat{w}_h}(x, a) = V_{\widehat{w}_h}(x). \quad (\text{B.15})$$

Recall that the true Bellman optimality operator in state space  $\mathcal{T} : \mathcal{X} \rightarrow \mathcal{X}$  is defined as

$$[\mathcal{T}V](x) := \max_a \left[ r(x, a) + \sum_{x'} P(x'|x, a)V(x') \right]. \quad (\text{B.16})$$

**Step 2.** We verify that the true Bellman operator on  $\Pi_{[0,H]}V_{\widehat{w}_{h+1}}$  can also be written as a linear form. From Definition 2.1, there exists some functions  $\psi(\cdot) = (\psi_k(\cdot))_{k \in \mathcal{K}}$  such that for every  $x, a, x'$ , the transition function can be represented as

$$P(x'|x, a) = \sum_{k \in \mathcal{K}} \phi_k(x, a)\psi_k(x'), \quad (\text{B.17})$$

where  $\mathcal{K} \subseteq [d]$  and  $|\mathcal{K}| \leq s$ . For a vector  $\bar{w}_h \in \mathbb{R}^d$ , we define its  $k$ th coordinate as

$$\bar{w}_{h,k} = \sum_{x'} \Pi_{[0,H]}V_{\widehat{w}_{h+1}}(x')\psi_k(x'), \text{ if } k \in \mathcal{K}, \quad (\text{B.18})$$

and  $\bar{w}_{h,k} = 0$  if  $k \notin \mathcal{K}$ . By the definition of true Bellman optimality operator in Eq. (B.16) and Eq. (B.17),

$$\begin{aligned} [\mathcal{T}\Pi_{[0,H]}V_{\widehat{w}_{h+1}}](x) &= \max_a \left[ r(x, a) + \sum_{x'} P(x'|x, a)\Pi_{[0,H]}V_{\widehat{w}_{h+1}}(x') \right] \\ &= \max_a \left[ r(x, a) + \sum_{x'} \phi(x, a)^\top \psi(x')\Pi_{[0,H]}V_{\widehat{w}_{h+1}}(x') \right] \\ &= \max_a \left[ r(x, a) + \sum_{x'} \sum_{k \in \mathcal{K}} \phi_k(x, a)\psi_k(x')\Pi_{[0,H]}V_{\widehat{w}_{h+1}}(x') \right] \\ &= \max_a \left[ r(x, a) + \sum_{k \in \mathcal{K}} \phi_k(x, a) \sum_{x'} \psi_k(x')\Pi_{[0,H]}V_{\widehat{w}_{h+1}}(x') \right] \\ &= \max_a \left[ r(x, a) + \phi(x, a)^\top \bar{w}_h \right]. \end{aligned} \quad (\text{B.19})$$

We interpret  $\bar{w}_h$  as the ground truth of the Lasso estimator in Eq. (4.1) at step  $h$  in terms of the following sparse linear regression:

$$\Pi_{[0,H]}V_{\widehat{w}_{h+1}}(x'_i) = \phi(x_i, a_i)^\top \bar{w}_h + \varepsilon_i, i = 1 \dots, RH, \quad (\text{B.20})$$

where  $\varepsilon_i = \Pi_{[0,H]}V_{\widehat{w}_{h+1}}(x'_i) - \phi(x_i, a_i)^\top \bar{w}_h$ . Define the filtration  $\mathcal{F}_i$  generated by  $\{(x_1, a_1), \dots, (x_i, a_i)\}$  and also the data in folds  $h + 1$  to  $H$ . By the definition of  $V_{\widehat{w}_{h+1}}$  and  $\bar{w}_h$ , we have

$$\begin{aligned} \mathbb{E}[\varepsilon_i | \mathcal{F}_i] &= \mathbb{E}[\Pi_{[0,H]}V_{\widehat{w}_{h+1}}(x'_i) | \mathcal{F}_i] - \phi(x_i, a_i)^\top \bar{w}_h \\ &= \sum_{x'} [\Pi_{[0,H]}V_{\widehat{w}_{h+1}}](x')P(x'|x_i, a_i) - \phi(x_i, a_i)^\top \bar{w}_h \\ &= \sum_{k \in \mathcal{K}} \phi_k(x_i, a_i) \sum_{x'} [\Pi_{[0,H]}V_{\widehat{w}_{h+1}}](x')\psi_k(x') - \phi(x_i, a_i)^\top \bar{w}_h = 0. \end{aligned}$$

Therefore,  $\{\varepsilon_i\}_{i=1}^{RH}$  is a sequence of martingale difference noises and  $|\varepsilon_i| \leq H$  due to the truncation operator  $\Pi_{[0,H]}$ . The next lemma bounds the difference between  $\widehat{w}_h$  and  $\bar{w}_h$  within  $\ell_1$ -norm. The proof is deferred to Appendix B.5.

**Lemma B.1.** Consider the sparse linear regression described in Eq. (B.20). Suppose the number of episodes used in step  $h$  satisfies

$$R \geq \frac{C_1 \log(3d^2/\delta)s^2}{C_{\min}(\Sigma^{\pi_e}, s)},$$

for some absolute constant  $C_1 > 0$ . With the choice of  $\lambda_1 = H\sqrt{\log(2d/\delta)/(RH)}$ , the following holds with probability at least  $1 - \delta$ ,

$$\|\widehat{w}_h - \bar{w}_h\|_1 \leq \frac{16\sqrt{2}s}{C_{\min}(\Sigma^{\pi_e}, s)} H \sqrt{\frac{\log(2d/\delta)}{RH}}. \quad (\text{B.21})$$

**Step 3.** We start to bound  $\|V_{\hat{w}_h} - V_h^*\|_\infty$  for each step  $h$ . By the approximate value iteration form Eq. (B.15) and the definition of optimal value function,

$$\begin{aligned} \|V_{\hat{w}_h} - V_h^*\|_\infty &= \|\widehat{\mathcal{T}}^{(h)}\Pi_{[0,H]}V_{\hat{w}_{h+1}} - \mathcal{T}V_{h+1}^*\|_\infty \\ &= \|\widehat{\mathcal{T}}^{(h)}\Pi_{[0,H]}V_{\hat{w}_{h+1}} - \mathcal{T}\Pi_{[0,H]}V_{\hat{w}_{h+1}}\|_\infty + \|\mathcal{T}\Pi_{[0,H]}V_{\hat{w}_{h+1}} - \mathcal{T}V_{h+1}^*\|_\infty. \end{aligned} \quad (\text{B.22})$$

The first term mainly captures the error between approximate Bellman optimality operator and true Bellman optimality operator. From linear forms Eqs. (B.15) and (B.19), it holds for any  $x \in \mathcal{X}$ ,

$$\begin{aligned} &[\widehat{\mathcal{T}}^{(h)}\Pi_{[0,H]}V_{\hat{w}_{h+1}}](x) - [\mathcal{T}\Pi_{[0,H]}V_{\hat{w}_{h+1}}](x) \\ &= \max_a \left[ r(x, a) + \phi(x, a)^\top \hat{w}_h \right] - \max_a \left[ r(x, a) + \phi(x, a)^\top \bar{w}_h \right] \\ &\leq \max_a |\phi(x, a)^\top (\hat{w}_h - \bar{w}_h)| \\ &\leq \max_{a,x} \|\phi(x, a)\|_\infty \|\hat{w}_h - \bar{w}_h\|_1. \end{aligned} \quad (\text{B.23})$$

Applying Lemma B.1, the following error bound holds with probability at least  $1 - \delta$ ,

$$\|\hat{w}_h - \bar{w}_h\|_1 \leq \frac{16\sqrt{2}s}{C_{\min}(\Sigma^{\pi_e}, s)} H \sqrt{\frac{\log(2d/\delta)}{RH}}, \quad (\text{B.24})$$

where  $R$  satisfies  $R \geq C_1 \log(3d^2/\delta)s^2/C_{\min}(\Sigma^{\pi_e}, s)$ .

Note that the samples we use between phases are mutually independent. Thus Eq. (B.24) uniformly holds for all  $h \in [H]$  with probability at least  $1 - H\delta$ . Plugging it into Eq. (B.23), we have for any stage  $h \in [H]$ ,

$$\|\widehat{\mathcal{T}}^{(h)}\Pi_{[0,H]}V_{\hat{w}_{h+1}} - \mathcal{T}\Pi_{[0,H]}V_{\hat{w}_{h+1}}\|_\infty \leq \frac{16\sqrt{2}s}{C_{\min}(\Sigma^{\pi_e}, s)} H \sqrt{\frac{\log(2dH/\delta)}{RH}}, \quad (\text{B.25})$$

holds with probability at least  $1 - \delta$ .

To bound the second term in Eq. (B.22), we observe that

$$\begin{aligned} \|\mathcal{T}\Pi_{[0,H]}V_{\hat{w}_{h+1}} - \mathcal{T}V_{h+1}^*\|_\infty &= \max_x |\mathcal{T}\Pi_{[0,H]}V_{\hat{w}_{h+1}}(x) - \mathcal{T}V_{h+1}^*(x)| \\ &\leq \max_x \max_a \left| \sum_{x'} P(x'|x, a) \Pi_{[0,H]}V_{\hat{w}_{h+1}}(x') - \sum_{x'} P(x'|x, a) \Pi_{[0,H]}V_{h+1}^*(x') \right| \\ &\leq \|\Pi_{[0,H]}V_{\hat{w}_{h+1}} - V_{h+1}^*\|_\infty. \end{aligned} \quad (\text{B.26})$$

Plugging Eqs. (B.25) and (B.26) into Eq. (B.22), it holds that

$$\|V_{\hat{w}_h} - V_h^*\|_\infty \leq \frac{16\sqrt{2}s}{C_{\min}(\Sigma^{\pi_e}, s)} H \sqrt{\frac{\log(2dH/\delta)}{RH}} + \|\Pi_{[0,H]}V_{\hat{w}_{h+1}} - V_{h+1}^*\|_\infty, \quad (\text{B.27})$$

with probability at least  $1 - \delta$ . Recursively using Eq. (B.27), the following holds with probability  $1 - \delta$ ,

$$\begin{aligned} \|\Pi_{[0,H]}V_{\hat{w}_1} - V_1^*\|_\infty &\leq \|V_{\hat{w}_1} - V_1^*\|_\infty \\ &= \frac{16\sqrt{2}s}{C_{\min}(\Sigma^{\pi_e}, s)} H \sqrt{\frac{\log(2dH/\delta)}{RH}} + \|\Pi_{[0,H]}V_{\hat{w}_2} - V_2^*\|_\infty \\ &\leq \|\Pi_{[0,H]}V_{\hat{w}_{H+1}} - V_{H+1}^*\|_\infty + H^2 \frac{16\sqrt{2}s}{C_{\min}(\Sigma^{\pi_e}, s)} \sqrt{\frac{\log(2dH/\delta)}{RH}} \\ &= H^2 \frac{16\sqrt{2}s}{C_{\min}(\Sigma^{\pi_e}, s)} \sqrt{\frac{\log(2dH/\delta)}{RH}}, \end{aligned}$$

where the first inequality is due to that  $\Pi_{[0,H]}$  can only make error smaller and the last inequality is due to  $V_{\hat{w}_{H+1}} = V_{H+1}^* = 0$ . From Proposition 2.14 in Bertsekas [1995],

$$\|V_1^{\widehat{\pi}^{N_1}} - V_1^*\|_\infty \leq H \|Q_{\hat{w}_1} - Q_1^*\|_\infty \leq 2H \|\Pi_{[0,H]}V_{\hat{w}_1} - V_1^*\|_\infty. \quad (\text{B.28})$$



Putting the above together, we have with probability at least  $1 - \delta$ ,

$$\|V_1^{\widehat{\pi}^{N_1}} - V_1^*\|_\infty \leq \frac{32\sqrt{2}sH^3}{C_{\min}(\Sigma^{\pi_e}, s)} \sqrt{\frac{\log(2dH/\delta)}{N_1}},$$

when the number of episodes in the exploration phase has to satisfy

$$N_1 \geq \frac{C_1 s^2 H \log(3d^2/\delta)}{C_{\min}(\Sigma^{\pi_e}, s)},$$

for some sufficiently large constant  $C_1$ . This ends the proof.  $\square$

## B.5 Proof of Lemma B.1

*Proof.* Denote the empirical covariance matrix induced by the exploratory policy  $\pi_e$  and feature map  $\phi$  as

$$\widehat{\Sigma}^{\pi_e} := \frac{1}{R} \sum_{r=1}^R \frac{1}{H} \sum_{h=1}^H \phi(x_h^r, a_h^r) \phi(x_h^r, a_h^r)^\top.$$

Recall that  $\Sigma^{\pi_e}$  is the population covariance matrix induced by the exploratory policy  $\pi_e$  defined in Eq. (3.1) and feature map  $\phi$  with  $\sigma_{\min}(\Sigma^{\pi_e}) > 0$ . From the definition of restricted eigenvalue in (A.1) it is easy to verify  $C_{\min}(\Sigma^{\pi_e}, s) \geq \sigma_{\min}(\Sigma^{\pi_e}) > 0$ . For any  $i, j \in [d]$ , denote

$$v_{ij}^r = \frac{1}{H} \sum_{h=1}^H \phi_i(x_h^r, a_h^r) \phi_j(x_h^r, a_h^r) - \Sigma_{ij}^{\pi_e}.$$

It is easy to verify  $\mathbb{E}[v_{ij}^r] = 0$  and  $|v_{ij}^r| \leq 1$  since we assume  $\|\phi(x, a)\|_\infty \leq 1$ . Note that samples between different episodes are independent. This implies  $v_{ij}^1, \dots, v_{ij}^R$  are independent. By standard Hoeffding's inequality (Proposition 5.10 in Vershynin [2010]), we have

$$\mathbb{P}\left(\left|\sum_{r=1}^R v_{ij}^r\right| \geq \delta\right) \leq 3 \exp\left(-\frac{C_0 \delta^2}{R}\right),$$

for some absolute constant  $C_0 > 0$ . Applying an union bound over  $i, j \in [d]$ , we have

$$\begin{aligned} \mathbb{P}\left(\max_{i,j} \left|\sum_{r=1}^R v_{ij}^r\right| \geq \delta\right) &\leq 3d^2 \exp\left(-\frac{C_0 \delta^2}{R}\right) \\ \Rightarrow \mathbb{P}\left(\|\widehat{\Sigma}^{\pi_e} - \Sigma^{\pi_e}\|_\infty \geq \delta\right) &\leq 3d^2 \exp\left(-\frac{C_0 \delta^2}{R}\right). \end{aligned}$$

It implies the following holds with probability  $1 - \delta$ ,

$$\|\widehat{\Sigma}^{\pi_e} - \Sigma^{\pi_e}\|_\infty \leq \sqrt{\frac{\log(3d^2/\delta)}{R}}.$$

When the number of episodes  $R \geq 32^2 \log(3d^2/\delta) s^2 / C_{\min}(\Sigma^{\pi_e}, s)^2$ , the following holds with probability at least  $1 - \delta$ ,

$$\|\widehat{\Sigma}^{\pi_e} - \Sigma^{\pi_e}\|_\infty \leq \frac{C_{\min}(\Sigma^{\pi_e}, s)}{32s}.$$

Next lemma shows that if the restricted eigenvalue condition holds for one positive semi-definite matrix  $\Sigma_0$ , then it holds with high probability for another positive semi-definite matrix  $\Sigma_1$  as long as  $\Sigma_0$  and  $\Sigma_1$  are close enough in terms of entry-wise max norm.

**Lemma B.2** (Corollary 6.8 in Bühlmann and Van De Geer, 2011). Let  $\Sigma_0$  and  $\Sigma_1$  be two positive semi-definite block diagonal matrices. Suppose that the restricted eigenvalue of  $\Sigma_0$  satisfies  $C_{\min}(\Sigma_0, s) > 0$  and  $\|\Sigma_1 - \Sigma_0\|_\infty \leq C_{\min}(\Sigma_0, s)/(32s)$ . Then the restricted eigenvalue of  $\Sigma_1$  satisfies  $C_{\min}(\Sigma_1, s) > C_{\min}(\Sigma_0, s)/2$ .

Applying Lemma B.2 with  $\widehat{\Sigma}^{\pi_e}$  and  $\Sigma^{\pi_e}$ , we have the restricted eigenvalue of  $\widehat{\Sigma}^{\pi_e}$  satisfies  $C_{\min}(\widehat{\Sigma}^{\pi_e}, s) > C_{\min}(\Sigma^{\pi_e}, s)/2$  with high probability.

Note that  $\{\varepsilon_i \phi_j(x_i, a_i)\}_{i=1}^{RH}$  is also a martingale difference sequence and  $|\varepsilon_i \phi_j(x_i, a_i)| \leq H$ . By Azuma-Hoeffding inequality,

$$\mathbb{P}\left(\max_{j \in [d]} \left| \frac{1}{RH} \sum_{i=1}^{RH} \varepsilon_i \phi_j(x_i, a_i) \right| \leq H \sqrt{\frac{\log(2d/\delta)}{RH}}\right) \geq 1 - \delta.$$

Denote event  $\mathcal{E}$  as

$$\mathcal{E} = \left\{ \max_{j \in [d]} \left| \frac{1}{RH} \sum_{i=1}^{RH} \varepsilon_i \phi_j(x_i, a_i) \right| \leq \lambda_1 \right\}.$$

Then  $\mathbb{P}(\mathcal{E}) \geq 1 - \delta$ . Under event  $\mathcal{E}$ , applying (B.31) in Bickel et al. [2009], we have

$$\|\widehat{w}_h - \bar{w}_h\|_1 \leq \frac{16\sqrt{2}s\lambda_1}{C_{\min}(\Sigma^{\pi_e}, s)},$$

holds with probability at least  $1 - 2\delta$ . This ends the proof.  $\square$

## C Supporting lemmas

**Lemma C.1** (Pinsker's inequality). Denote  $\mathbf{x} = \{x_1, \dots, x_T\} \in \mathcal{X}^T$  as the observed states from step 1 to  $T$ . Then for any two distributions  $P_1$  and  $P_2$  over  $\mathcal{X}^T$  and any bounded function  $f : \mathcal{X}^T \rightarrow [0, B]$ , we have

$$\mathbb{E}_1 f(\mathbf{x}) - \mathbb{E}_2 f(\mathbf{x}) \leq \sqrt{\log 2/2} B \sqrt{\text{KL}(P_2 \| P_1)},$$

where  $\mathbb{E}_1$  and  $\mathbb{E}_2$  are expectations with respect to  $P_1$  and  $P_2$ .

**Lemma C.2** (Bretagnolle-Huber inequality). Let  $\mathbb{P}$  and  $\widetilde{\mathbb{P}}$  be two probability measures on the same measurable space  $(\Omega, \mathcal{F})$ . Then for any event  $\mathcal{D} \in \mathcal{F}$ ,

$$\mathbb{P}(\mathcal{D}) + \widetilde{\mathbb{P}}(\mathcal{D}^c) \geq \frac{1}{2} \exp\left(-\text{KL}(\mathbb{P}, \widetilde{\mathbb{P}})\right), \quad (\text{C.1})$$

where  $\mathcal{D}^c$  is the complement event of  $\mathcal{D}$  ( $\mathcal{D}^c = \Omega \setminus \mathcal{D}$ ) and  $\text{KL}(\mathbb{P}, \widetilde{\mathbb{P}})$  is the KL divergence between  $\mathbb{P}$  and  $\widetilde{\mathbb{P}}$ , which is defined as  $+\infty$ , if  $\mathbb{P}$  is not absolutely continuous with respect to  $\widetilde{\mathbb{P}}$ , and is  $\int_{\Omega} d\mathbb{P}(\omega) \log \frac{d\mathbb{P}}{d\widetilde{\mathbb{P}}}(\omega)$  otherwise.

The proof can be found in the book of Tsybakov [2008]. When  $\text{KL}(\mathbb{P}, \widetilde{\mathbb{P}})$  is small, we may expect the probability measure  $\mathbb{P}$  is close to the probability measure  $\widetilde{\mathbb{P}}$ . Note that  $\mathbb{P}(\mathcal{D}) + \mathbb{P}(\mathcal{D}^c) = 1$ . If  $\widetilde{\mathbb{P}}$  is close to  $\mathbb{P}$ , we may expect  $\mathbb{P}(\mathcal{D}) + \widetilde{\mathbb{P}}(\mathcal{D}^c)$  to be large.

**Lemma C.3** (Divergence decomposition). Let  $\mathbb{P}$  and  $\widetilde{\mathbb{P}}$  be two probability measures on the sequence  $(A_1, Y_1, \dots, A_n, Y_n)$  for a fixed bandit policy  $\pi$  interacting with a linear contextual bandit with standard Gaussian noise and parameters  $\theta$  and  $\tilde{\theta}$  respectively. Then the KL divergence of  $\mathbb{P}$  and  $\widetilde{\mathbb{P}}$  can be computed exactly and is given by

$$\text{KL}(\mathbb{P}, \widetilde{\mathbb{P}}) = \frac{1}{2} \sum_{x \in \mathcal{A}} \mathbb{E}[T_x(n)] \langle x, \theta - \tilde{\theta} \rangle^2, \quad (\text{C.2})$$

where  $\mathbb{E}$  is the expectation operator induced by  $\mathbb{P}$ .

This lemma appeared as Lemma 15.1 in the book of Lattimore and Szepesvári [2020], where the reader can also find the proof.

**Lemma C.4** (Lemma 20 in Jaksch et al. [2010]). Suppose  $0 \leq q \leq 1/2$  and  $\epsilon \leq 1 - 2q$ , then

$$q \log\left(\frac{q}{q+\epsilon}\right) + (1-q) \log\left(\frac{1-q}{1-q-\epsilon}\right) \leq \frac{2\epsilon^2}{q}.$$

**Lemma C.5** (Pinsker's inequality). For measures  $P$  and  $Q$  on the same probability space  $(\Omega, \mathcal{F})$ , we have

$$\delta(P, Q) = \sup_{A \in \mathcal{F}} (P(A) - Q(A)) \leq \sqrt{\frac{1}{2} \text{KL}(P, Q)}.$$
